# Supplementary material for: First implementation of a new cross-disciplinary observation strategy for heavy precipitation events from formation to flooding
Source: Copernicus journal article supplement (doi:10.5194/hess-2022-131), 2022-04-29
Supplement: Supplementary file [file hess-2022-131-AC1-supplement.pdf]

**Reply on RC1:**

We cordially thank the anonymous reviewer for the valuable comments and the recommendations for the improvement of our manuscript.

In terms of the mentioned two minor comments of reviewer 1 (*in italic*) we are going to revise the manuscript:

1) *The paper is too long for me. I believe the authors may consider the reduction of some parts, avoiding to go too much in details in the description of the technological aspects of the measurement apparatus. Likely these descriptions can be moved in the supplementary material.*

**Reply:** In accordance with the reviewer's suggestion and also taking into account the comments of reviewer 2, we will substantially shorten the main manuscript in the revised version. We will move most of the detailed technical descriptions of the monitoring devices, including the gravimetry approach, and the detailed description of the weather situation during the intensive operation phases into the supplementary material. By this way, we expect to significantly improve the readability of the paper, and to focus on its main messages.

2) *The HYDRATE project (<https://cordis.europa.eu/project/id/37024>), ended in 2010, has been specifically designed to monitor flash floods and hence with a purpose very close to that addressed by the authors in this study, and in the future monitoring campaigns. I would suggest to make a link to this project also to benefit from the experience gained.*

**Reply:** This is indeed a relevant study, thank you for mentioning it. It will be carefully considered and reference to it will be given in the revised version.
